# Supplementary material for: Prognostic utility of rhythmic components in 24-hour ambulatory blood pressure monitoring for the risk stratification of chronic kidney disease patients with cardiovascular co-morbidity
Source: PubMed Central journal article supplement — medRxiv. 2023 May 5:2023.05.02.23289413. Preprint. [Version 1] doi: 10.1101/2023.05.02.23289413 (PMC10187452; doi:10.1101/2023.05.02.23289413), 2023-05-05
Supplement: NIHPP2023.05.02.23289413v1-supplement-1.pdf [file NIHPP2023.05.02.23289413v1-supplement-1.pdf]

## Supplementary Figures

A. Dipper, with Rhythmic Components

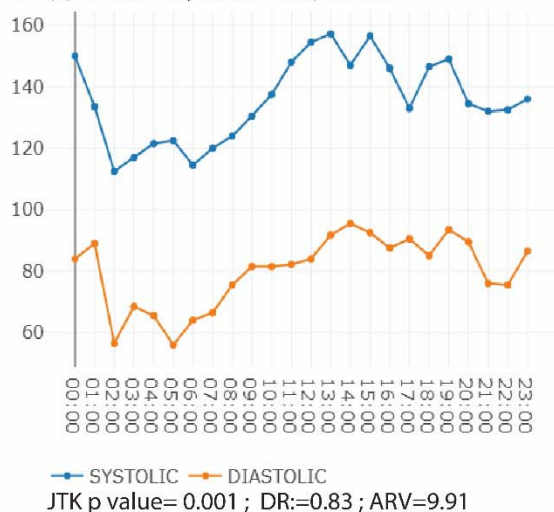

B. Dipper, without Rhythmic Components

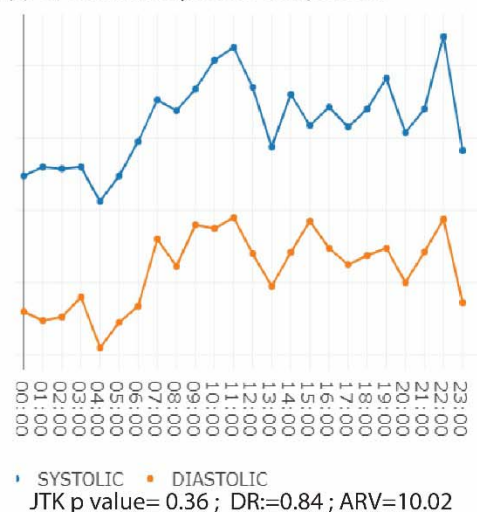

C. Non-Dipper, with Rhythmic Components

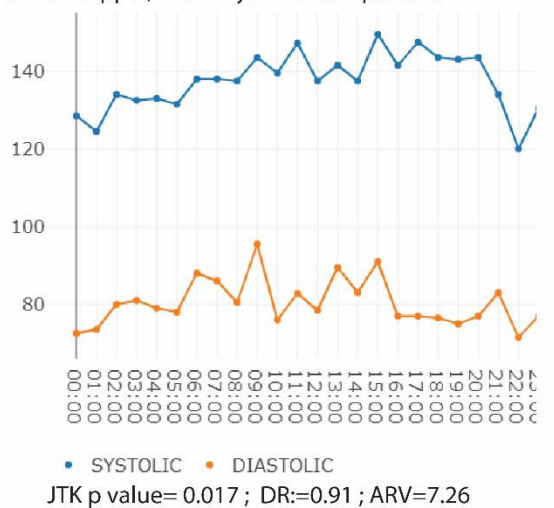

D. Non-Dipper, without Rhythmic Components

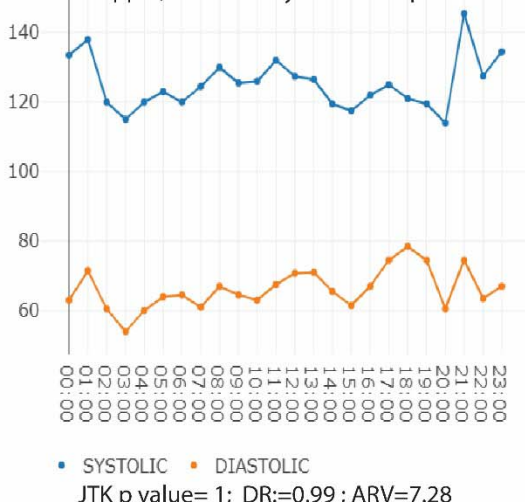

E. Rev-Dipper, with Rhythmic Components

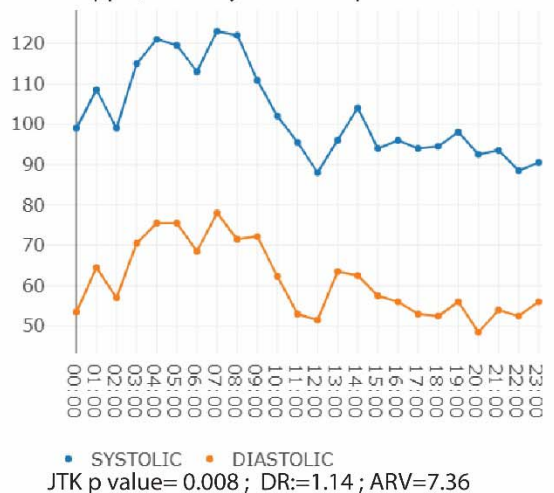

F. Rev-Dipper, without Rhythmic Components

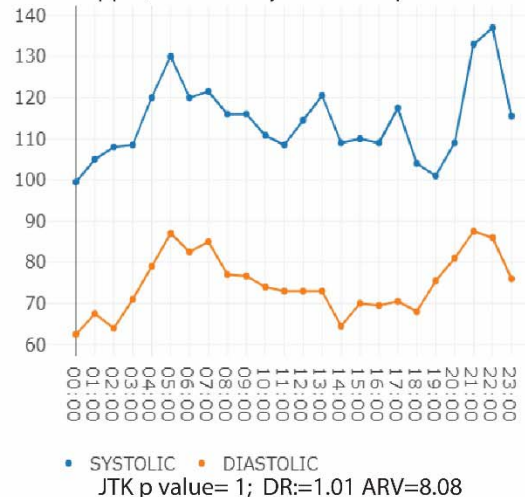

**Figure S1.** Juxtaposition of 24 hour blood pressure curves and blood pressure variability metrics from six CRIC participants to illustrate the discriminatory characteristics on the basis of the JTK\_CYCLE analysis while **DR** (Dipping Ratio) and **ARV** (Average real variability) show similar values between pairs of dippers in A and B, non-dippers in C and D, and reverse dippers in E and F.

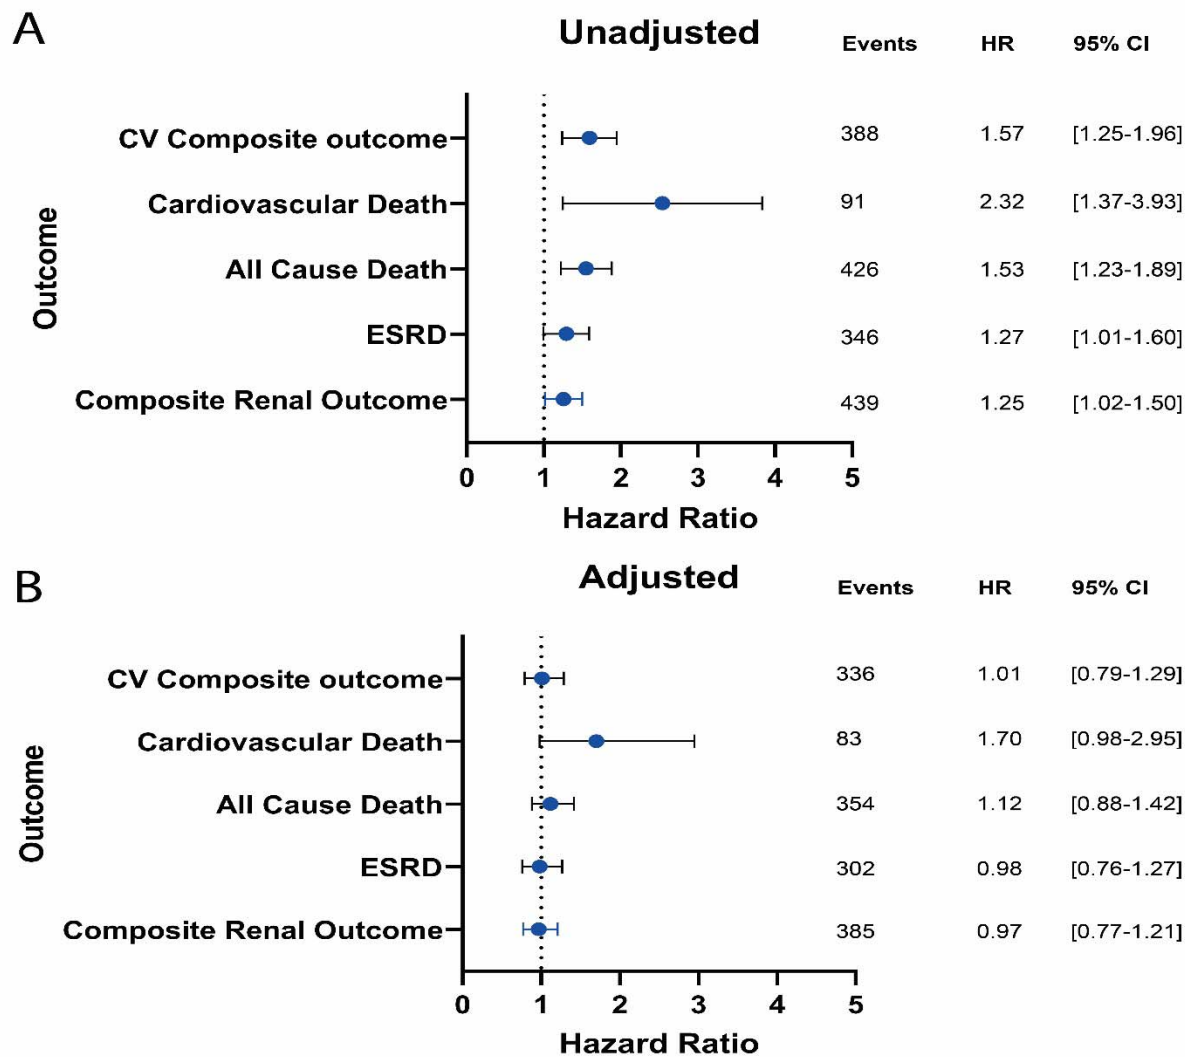

**Figure S2.** Hazard ratios for the absence of rhythmic components (JTK p value >0.05) and reaching different outcomes in the CRIC cohort as compared to the retention of rhythmic components (JTK p value ≤0.05). **A.** Unadjusted model **B.** Adjusted for Age, BMI, Sex, Diabetes, Race, eGFR, Urine Protein to Creatinine Ratio, Clinic SBP, Clinic DBP, Prior CVD.

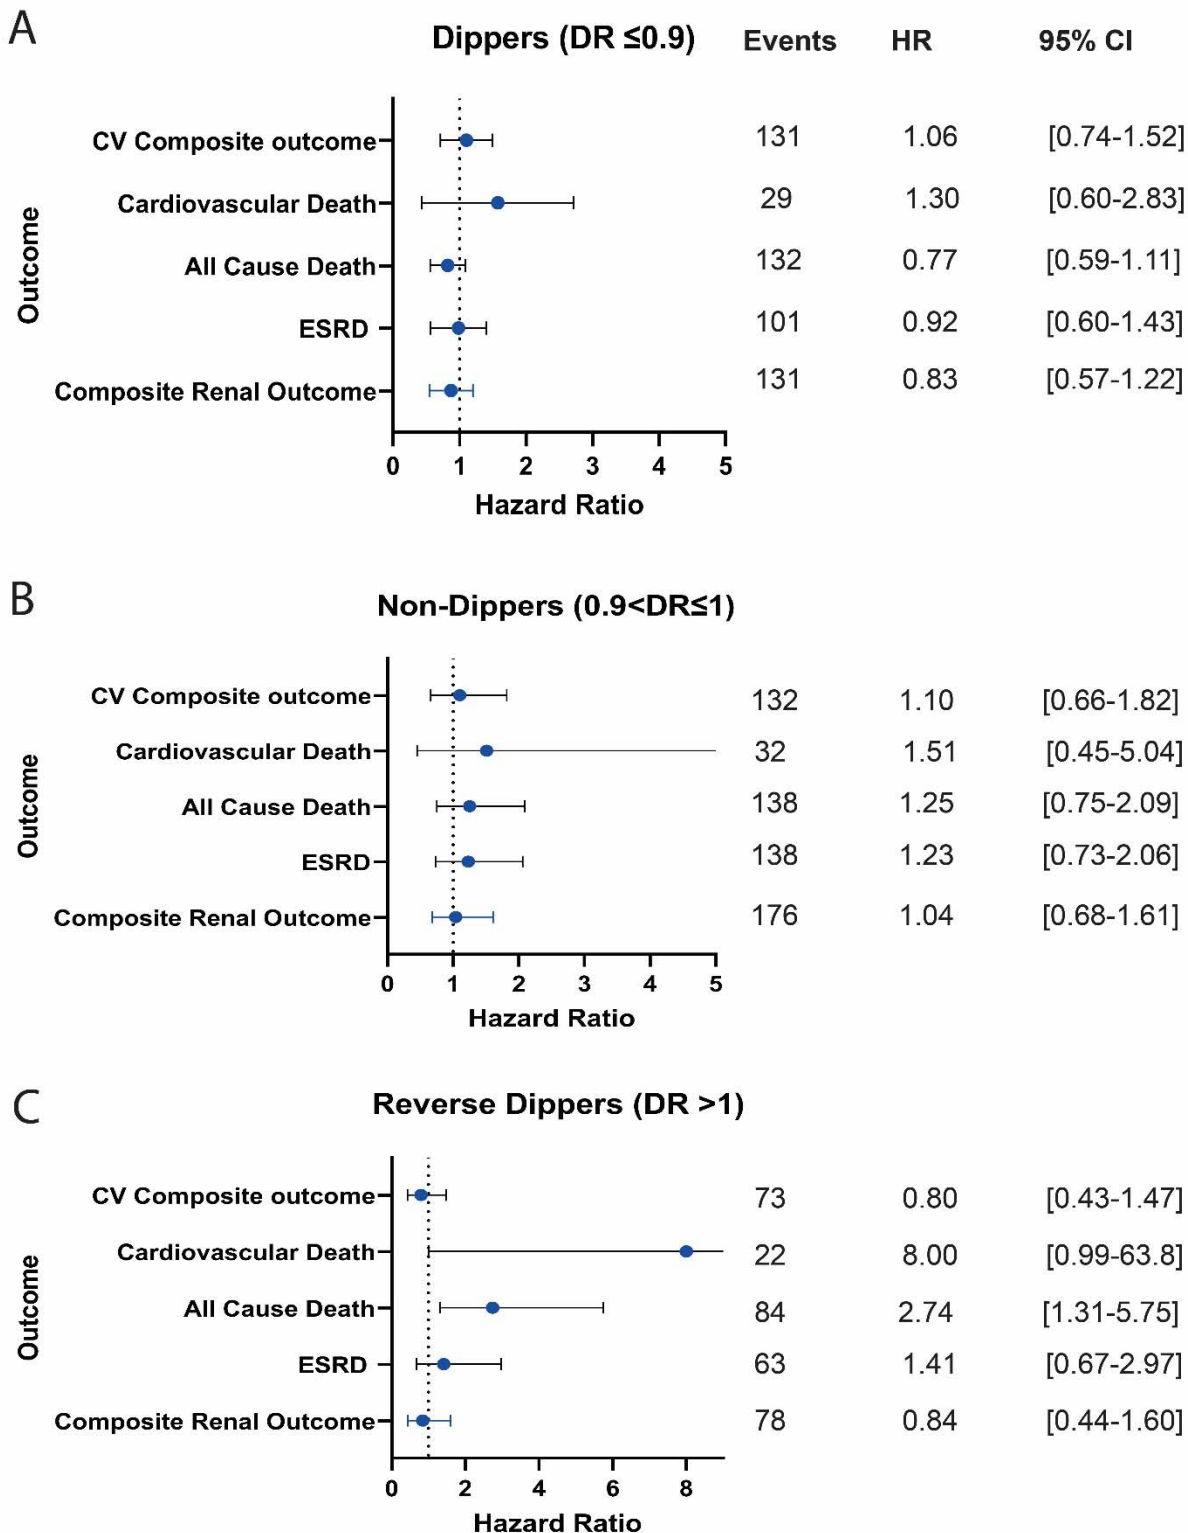

**Figure S3:** Hazard ratios for the absence of rhythmic components (JTK p value >0.05) and reaching different outcomes as compared to the retention of rhythmic components (JTK p value

$\leq 0.05$ ) from the CRIC cohort. Adjusted for Age, BMI, Sex, Diabetes, Race, eGFR, Urine Protein to Creatinine Ratio, Clinic SBP, Clinic DBP, Prior CVD. **A.** Analysis performed only in dippers. **B.** Analysis performed only in non-dippers. **C.** Analysis performed only in reverse dippers. DR: Dipping ratio, CV: Cardiovascular, CVD: Cardiovascular disease, ESRD: End stage renal disease.

## Supplemental Tables

**Table S1** Blood pressure profiles of participants in both cohorts. Blood pressure parameters were computed from 24 Hour ABPM (the first 24 Hour ABPM in AASK).

|                                                                                                                          | <b>CRIC</b> | <b>AASK</b> |
|--------------------------------------------------------------------------------------------------------------------------|-------------|-------------|
|                                                                                                                          | <b>N(%)</b> | <b>N(%)</b> |
| <b>Rhythmic Components present (JTK <math>p \leq 0.05</math>)</b>                                                        | 514 (34%)   | 169 (26%)   |
| <b>Rhythmic Components absent (JTK <math>p &gt; 0.05</math>)</b>                                                         | 988 (66%)   | 474 (74%)   |
| <b>Dipper (DR <math>\leq 0.9</math>)</b>                                                                                 | 678 (45%)   | 127 (20%)   |
| <b>Dipper w/ rhythmic components (DR <math>\leq 0.9</math> &amp; JTK <math>&lt; 0.05</math>)</b>                         | 376 (25%)   | 54 (8%)     |
| <b>Non-Dipper (0.9 <math>&lt;</math> DR <math>\leq 1</math>)</b>                                                         | 572 (38%)   | 266 (41%)   |
| <b>Non-Dipper w/ rhythmic components (0.9 <math>&lt;</math> DR <math>\leq 1</math> &amp; JTK <math>&lt; 0.05</math>)</b> | 92 (6%)     | 38 (6%)     |
| <b>Reverse Dipper (DR <math>&gt; 1</math>)</b>                                                                           | 252 (17%)   | 250 (39%)   |
| <b>Reverse Dipper w/ rhythmic components (DR <math>&gt; 1</math> &amp; JTK <math>&lt; 0.05</math>)</b>                   | 46 (3%)     | 77 (12%)    |
| <b>Controlled BP (24 Hr Mean <math>&lt; 125/75</math>)</b>                                                               | 549 (37%)   | 100 (16%)   |

**Uncontrolled BP (24 Hr Mean  $\geq$ 125/75)**                      953 (63%)                      543 (85%)

---

**Table S2.** Multivariate logistic regression for non-dipping status (dipping ratio  $>0.9$ ) among CRIC cohort participants. All variables in the table were included as covariates in the model. eGFR: estimated glomerular filtration rate by the CRIC cohort equation. BP: blood pressure. PCR: urine protein to creatinine ratio.



| <b>Covariate</b>                              | <b>Odds Ratio</b> | <b>95%CI Lower</b> | <b>95%CI Upper</b> | <b>P-value</b> |
|-----------------------------------------------|-------------------|--------------------|--------------------|----------------|
| Age <45                                       | Reference         |                    |                    |                |
| Age From 45 to <65                            | 1.32              | 0.8                | 2.18               | 0.276          |
| Age 65+                                       | 1.17              | 1.01               | 2.78               | 0.047          |
| BMI <25                                       | Reference         |                    |                    |                |
| BMI 25 to <30                                 | 1.07              | 0.74               | 1.55               | 0.705          |
| BMI ≥30                                       | 1.27              | 0.89               | 1.8                | 0.182          |
| eGFR >60 ml/min/1.73m <sup>2</sup>            | Reference         |                    |                    |                |
| eGFR: 30 to <60 ml/min/1.73m <sup>2</sup>     | 1.11              | 0.82               | 1.51               | 0.483          |
| eGFR<30 ml/min/1.73m <sup>2</sup>             | 1.46              | 0.99               | 2.15               | 0.059          |
| Proteinuria (PCR <150mg/g)                    | Reference         |                    |                    |                |
| Proteinuria (PCR: 150-500 mg/g)               | 1.08              | 0.8                | 1.46               | 0.623          |
| Proteinuria (PCR>500 mg/g)                    | 1.56              | 1.12               | 2.17               | 0.009          |
| Controlled BP                                 | Reference         |                    |                    |                |
| Un-Controlled BP (Mean 24 Hr BP ≥ 125/75mmHg) | 1.64              | 1.27               | 2.12               | <0.001         |
| Male Sex                                      | Reference         |                    |                    |                |
| Female Sex                                    | 0.85              | 0.67               | 1.09               | 0.195          |
| Non-Diabetic                                  | Reference         |                    |                    |                |
| Diabetic                                      | 1.23              | 0.96               | 1.67               | 0.1            |
| Race: White                                   | Reference         |                    |                    |                |
| Race: Black                                   | 1.55              | 1.2                | 2.01               | 0.001          |

|                |           |      |      |        |
|----------------|-----------|------|------|--------|
| Race: Other    | 0.92      | 0.63 | 1.32 | 0.64   |
| Prior CVD: No  | Reference |      |      |        |
| Prior CVD: Yes | 1.58      | 1.23 | 2.03 | <0.001 |

**Table S3.** Mixed effects logistic regression for non-dipping status (dipping ratio >0.9 among AASK cohort participants. All variables in the table were included as covariates in the model. eGFR: estimated glomerular filtration rate by the 2021 CKD-EPI equation. PCR: urine protein to creatinine ratio. BP: blood pressure. ACE I: angiotensin converting enzyme inhibitor. CCB: calcium channel blocker.

| Covariate                                     | Odds Ratio | 95%CI Lower | 95%CI Upper | P-value |
|-----------------------------------------------|------------|-------------|-------------|---------|
| Age <45                                       | Reference  |             |             |         |
| Age From 45 to <65                            | 1.4        | 0.5         | 0.39        | 0.52    |
| Age 65+                                       | 1.62       | 0.57        | 4.6         | 0.368   |
| BMI <25                                       | Reference  |             |             |         |
| BMI 25 to <30                                 | 0.78       | 0.41        | 1.48        | 0.446   |
| BMI ≥30                                       | 1.25       | 0.66        | 2.38        | 0.491   |
| eGFR >60 ml/min/1.73m <sup>2</sup>            | Reference  |             |             |         |
| eGFR: 30 to <60 ml/min/1.73m <sup>2</sup>     | 1.94       | 0.68        | 5.59        | 0.218   |
| eGFR<30 ml/min/1.73m <sup>2</sup>             | 1.88       | 0.63        | 5.63        | 0.256   |
| Proteinuria (PCR <150mg/g)                    | Reference  |             |             |         |
| Proteinuria (PCR: 150-500 mg/g)               | 1.16       | 0.64        | 2.09        | 0.626   |
| Proteinuria (PCR>500 mg/g)                    | 1.08       | 0.6         | 1.93        | 0.803   |
| Controlled BP                                 | Reference  |             |             |         |
| Un-Controlled BP (Mean 24 Hr BP ≥ 125/75mmHg) | 2.02       | 1.23        | 3.31        | 0.006   |
| Male Sex                                      | Reference  |             |             |         |
| Female Sex                                    | 0.7        | 0.44        | 1.12        | 0.14    |
| Non-Diabetic                                  | Reference  |             |             |         |
| Diabetic                                      | 0.53       | 0.28        | 0.99        | 0.048   |
| Prior CVD: No                                 | Reference  |             |             |         |
| Prior CVD: Yes                                | 1.19       | 0.74        | 1.91        | 0.467   |
| Drug Randomization Group: ACE I               | Reference  |             |             |         |
| Drug Randomization Group: Beta                | 1.86       | 1.12        | 3.1         | 0.016   |

|                                |           |      |      |       |
|--------------------------------|-----------|------|------|-------|
| Blocker                        |           |      |      |       |
| Drug Randomization Group: CCB  | 0.96      | 0.51 | 1.83 | 0.91  |
| <hr/>                          |           |      |      |       |
| BP Target Randomization Group: | Reference |      |      |       |
| Lower Target (MAP <92)         |           |      |      |       |
| BP Target Randomization Group: |           |      |      |       |
| Usual Target (MAP 102-107)     | 1.29      | 0.82 | 2.03 | 0.269 |
| <hr/>                          |           |      |      |       |
| Time from initial ABPM (years) | 0.996     | 0.89 | 1.12 | 0.96  |
| <hr/>                          |           |      |      |       |

**Table S4.** Cross Tabulation of dipping status and the presence or absence of rhythmic components in ABPM among participants with prior cardiovascular disease who died due to cardiovascular causes.

|                       | <b>Rhythmic<br/>Components<br/>Present</b> | <b>Rhythmic<br/>Components<br/>Absent</b> | <b>Total</b> |
|-----------------------|--------------------------------------------|-------------------------------------------|--------------|
| <b>Dipper</b>         | 6                                          | 14                                        | 20           |
| <b>Non-Dipper</b>     | 0                                          | 24                                        | 24           |
| <b>Reverse-Dipper</b> | 0                                          | 21                                        | 21           |
| <b>Total</b>          | 6                                          | 59                                        | 65           |

**Table S5.** Hazard ratios for the different dipping categories and reaching different outcomes from the CRIC cohort. Adjusted for Age, BMI, Sex, Diabetes, Race, eGFR, Urine Protein to Creatinine Ratio, Clinic SBP, Clinic DBP, Prior CVD. DR: Dipping ratio, CV: Cardiovascular, CVD: Cardiovascular disease, ESRD: End stage renal disease.

| Outcome                        | Dipping Category | Unadjusted Model |           |         | Adjusted Model |           |         |
|--------------------------------|------------------|------------------|-----------|---------|----------------|-----------|---------|
|                                |                  | Hazard Ratio     | 95% CI    | p-value | Hazard Ratio   | 95% CI    | p-value |
| <b>Composite Renal Outcome</b> | Dipper           | Reference        |           |         |                |           |         |
|                                | Non-Dipper       | 1.81             | 1.47-2.23 | <0.001  | 1.27           | 1.01-1.61 | 0.04    |
|                                | Reverse Dipper   | 2.99             | 1.53-2.60 | <0.001  | 1.40           | 1.05-1.90 | 0.021   |
| <b>ESRD</b>                    | Dipper           | Reference        |           |         |                |           |         |
|                                | Non-Dipper       | 1.8              | 1.42-2.28 | <0.001  | 1.07           | 0.82-1.41 | 0.617   |
|                                | Reverse Dipper   | 1.97             | 1.47-2.66 | <0.001  | 1.37           | 0.98-1.91 | 0.064   |
| <b>All Cause Death</b>         | Dipper           | Reference        |           |         |                |           |         |
|                                | Non-Dipper       | 1.4              | 1.12-1.74 | 0.003   | 0.93           | 0.73-1.18 | 0.549   |
|                                | Reverse Dipper   | 2.44             | 1.91-3.12 | <0.001  | 1.14           | 0.85-1.53 | 0.373   |
| <b>Cardiovascular Death</b>    | Dipper           | Reference        |           |         |                |           |         |
|                                | Non-Dipper       | 1.3              | 0.80-2.12 | 0.297   | 0.98           | 0.59-1.63 | 0.931   |
|                                | Reverse Dipper   | 2.55             | 1.52-4.28 | <0.001  | 1.12           | 0.61-2.04 | 0.717   |

---

|                     | Dipper         | Reference |           |        |      |           |       |  |
|---------------------|----------------|-----------|-----------|--------|------|-----------|-------|--|
| <b>CV Composite</b> | Non-Dipper     | 1.35      | 1.07-1.69 | 0.01   | 0.92 | 0.72-1.18 | 0.501 |  |
| <b>outcome</b>      | Reverse Dipper | 2.09      | 1.61-2.72 | <0.001 | 1.01 | 0.75-1.36 | 0.951 |  |

---



**Table S6.**

Hazard ratios for the different dipping categories and reaching different outcomes from the AASK cohort. Adjusted for Age, BMI, Sex, Diabetes, eGFR, Urine Protein to Creatinine Ratio, Clinic SBP, Clinic DBP, Prior CVD Drug and blood pressure target groups randomized to in the prior trial. DR: Dipping ratio, CV: Cardiovascular, CVD: Cardiovascular disease, ESRD: End stage renal disease.

| Outcome                        | Dipping Category | Unadjusted Model |           |         | Adjusted Model |           |         |
|--------------------------------|------------------|------------------|-----------|---------|----------------|-----------|---------|
|                                |                  | Hazard Ratio     | 95% CI    | p-value | Hazard Ratio   | 95% CI    | p-value |
| <b>Composite Renal Outcome</b> | Dipper           | Reference        |           |         |                |           |         |
|                                | Non-Dipper       | 1.05             | 0.69-1.61 | 0.816   | 0.80           | 0.43-1.46 | 0.462   |
|                                | Reverse Dipper   | 1.10             | 0.72-1.70 | 0.652   | 1.26           | 0.70-2.28 | 0.440   |
| <b>ESRD</b>                    | Dipper           | Reference        |           |         |                |           |         |
|                                | Non-Dipper       | 0.94             | 0.57-1.58 | 0.827   | 0.76           | 0.36-1.60 | 0.469   |
|                                | Reverse Dipper   | 0.98             | 0.58-1.64 | 0.930   | 1.42           | 0.68-2.97 | 0.350   |
| <b>All Cause Death</b>         | Dipper           | Reference        |           |         |                |           |         |
|                                | Non-Dipper       | 0.94             | 0.52-1.72 | 0.851   | 0.83           | 0.40-1.75 | 0.549   |
|                                | Reverse Dipper   | 1.70             | 0.97-2.98 | 0.065   | 1.33           | 0.68-2.62 | 0.406   |
| <b>Cardiovascular Death</b>    | Dipper           | Reference        |           |         |                |           |         |
|                                | Non-Dipper       | 1.06             | 0.32-3.45 | 0.956   | 1.68           | 0.44-6.46 | 0.447   |

|                     |                |      |           |       |      |           |       |
|---------------------|----------------|------|-----------|-------|------|-----------|-------|
|                     | Reverse Dipper | 2.39 | 0.81-7.06 | 0.133 | 2.04 | 0.57-7.46 | 0.282 |
|                     | Dipper         |      | Reference |       |      |           |       |
| <b>CV Composite</b> | Non-Dipper     | 1.41 | 0.80-2.49 | 0.236 | 1.57 | 0.81-3.08 | 0.180 |
| <b>outcome:</b>     | Reverse Dipper | 1.79 | 1.02-3.14 | 0.043 | 1.59 | 0.82-3.09 | 0.172 |

**Table S7.** Hazard ratios for the different average real variability (ARV) tertials and reaching different outcomes from the CRIC cohort. Adjusted for Age, BMI, Sex, Diabetes, Race, eGFR, Urine Protein to Creatinine Ratio, Clinic SBP, Clinic DBP, Prior CVD. CV: Cardiovascular, CVD: Cardiovascular disease, ESRD: End stage renal disease.

| Outcome                        | ARV Category | Unadjusted Model |           |         | Adjusted Model |           |         |
|--------------------------------|--------------|------------------|-----------|---------|----------------|-----------|---------|
|                                |              | Hazard Ratio     | 95% CI    | p-value | Hazard Ratio   | 95% CI    | p-value |
| <b>Composite Renal Outcome</b> | ≤9           | Reference        |           |         |                |           |         |
|                                | >9, ≤11      | 1.18             | 0.93-1.49 | 0.165   | 1.02           | 0.79-1.32 | 0.884   |
|                                | >11          | 1.47             | 1.17-1.85 | 0.001   | 0.95           | 0.72-1.24 | 0.688   |
| <b>ESRD</b>                    | ≤9           | Reference        |           |         |                |           |         |
|                                | >9, ≤11      | 1.11             | 0.85-1.45 | 0.44    | 1.04           | 0.77-1.39 | 0.82    |
|                                | >11          | 1.49             | 1.16-1.93 | 0.002   | 0.97           | 0.71-1.33 | 0.862   |
| <b>All Cause Death</b>         | ≤9           | Reference        |           |         |                |           |         |
|                                | >9, ≤11      | 1.43             | 1.12-1.84 | 0.004   | 1.12           | 0.85-1.47 | 0.437   |
|                                | >11          | 1.8              | 1.42-2.29 | <0.001  | 1.14           | 0.87-1.50 | 0.338   |
| <b>Cardiovascular Death</b>    | ≤9           | Reference        |           |         |                |           |         |
|                                | >9, ≤11      | 1.23             | 0.72-2.10 | 0.451   | 0.91           | 0.52-1.60 | 0.742   |
| <b>CV Composite outcome:</b>   | >11          | 1.64             | 0.99-2.72 | 0.057   | 0.91           | 0.53-1.57 | 0.732   |
|                                | ≤9           | Reference        |           |         |                |           |         |
|                                | >9, ≤11      | 1.45             | 1.12-1.89 | 0.006   | 1.22           | 0.92-1.63 | 0.165   |

>11                    2.05                    1.60-2.64 <0.001 1.27                    0.96-1.67 0.093

---
